# Supplementary material for: The Nephroprotective Properties of Extracellular Vesicles in Experimental Models of Chronic Kidney Disease: a Systematic Review
Source: PubMed Central journal article supplement (PMC8942930; doi:10.1007/s12015-021-10189-9), 2021-06-10

## **Supplementary material**

### **The nephroprotective properties of extracellular vesicles in experimental models of chronic kidney disease: a systematic review.**

**Natalia Nowak<sup>1</sup>, Masayuki Yamanouchi<sup>2</sup>, Eiichiro Satake<sup>3</sup>**

<sup>1</sup>Medical University of Bialystok, Faculty of Medicine, Centre for Bioinformatics and Data Analysis, Bialystok, Poland;

<sup>2</sup>Department of Nephrology and Laboratory Medicine, Faculty of Medicine, Institute of Medical, Pharmaceutical and Health Sciences, Graduate School of Medical Sciences, Kanazawa University, Ishikawa, Japan, Nephrology Center, Toranomon Hospital, Tokyo, Japan

<sup>3</sup>Section on Genetics and Epidemiology, Research Division, Joslin Diabetes Center, Boston, MA, USA, Department of Medicine, Harvard Medical School, Boston, MA, USA

**Corresponding author:**

Natalia Nowak, Phd  
Medical University of Bialystok  
Waszyngtona 13 Street  
Bialystok, Poland  
E-mail: [nuznowak@gmail.com](mailto:nuznowak@gmail.com)  
[natalia.nowak@umb.edu.pl](mailto:natalia.nowak@umb.edu.pl)

**Supplementary Table 1. Appraisal of research methods and risk of bias summary**

| Study                   | Concentration         | Size       | TEM  | Protein markers     | IF  | Blinding | Ethics statement | Randomisation | COI  |
|-------------------------|-----------------------|------------|------|---------------------|-----|----------|------------------|---------------|------|
| Cambier, 2018 [17]      | MF, concentration     | Yes (NTA)* | Yes* | Yes*                | Yes | -        | Yes              | -             | #    |
| Cantaluppi, 2015 [18]   | UC                    | Yes (NTA)  | Yes  | Yes                 | Yes | -        | Yes              | -             | None |
| Chen, 2019 [11]         | UC                    | Yes (DLS)  | Yes  | Yes                 | Yes | -        | Yes              | Yes           | None |
| Choi, 2015 [19]         | UC                    | -          | ?    | -                   | Yes | Yes      | Yes              | Yes           | None |
| Duan, 2020 [20]         | UC, MF                | Yes (DLS)  | Yes  | Yes                 | Yes | -        | Yes              | -             | None |
| Duan, 2019 [21]         | Precipitation         | Yes (TEM)  | Yes  | Yes                 | Yes | -        | Yes              | Yes           | None |
| Ebrahim, 2018 [22]      | UC                    | Yes (TEM)  | Yes  | Yes                 | Yes | -        | Yes              | Yes           | None |
| Eirin, 2020 [23]        | UC                    | Yes (NTA)* | Yes* | Yes                 | Yes | Yes      | Yes              | -             | #    |
| Eirin, 2017 [24]        | UC                    | Yes (NTA)  | Yes  | Yes                 | Yes | -        | Yes              | Yes           | None |
| Grange, 2019 [25]       | UC, MF                | Yes (NTA)  | -    | MSC-EV markers only | Yes | -        | Yes              | Yes           | #    |
| He, 2012 [26]           | UC                    | Yes (TEM)  | Yes  | -                   | Yes | Yes      | Yes              | Yes           | -    |
| He, 2015 [27]           | UC                    | Yes (TEM)  | Yes* | -                   | Yes | Yes      | Yes              | Yes           | None |
| Ji, 2020 [28]           | UC, MF                | Yes (NTA)  | Yes  | Yes                 | Yes | -        | Yes              | -             | None |
| Jiang, 2016 [29]        | UC, MF, DG            | Yes (TRPS) | Yes  | Yes                 | Yes | Yes      | Yes              | Yes           | None |
| Jin, 2019 [30]          | Immun-P, UF           | Yes (NTA)  | Yes  | Yes                 | Yes | -        | Yes              | -             | None |
| Jin, 2020 [31]          | Immun-P               | Yes (TEM)  | Yes  | Yes                 | Yes | -        | n.a.             | -             | None |
| Kholia, 2018 [32]       | DG-UC                 | Yes (NTA)  | Yes  | Yes                 | Yes | Yes      | Yes              | -             | -    |
| Kholia, 2020 [33]       | UC, MF                | Yes (NTA)  | Yes  | Yes                 | Yes | -        | Yes              | -             | None |
| Lindoso, 2020 [34]      | UC                    | Yes (NTA)  | Yes  | Yes                 | Yes | Yes      | Yes              | Yes           | None |
| Nagaishi, 2016 [35]     | UC                    | Yes (TEM)  | Yes  | Yes                 | Yes | -        | Yes              | -             | None |
| Ramirez-Bajo, 2020 [13] | UC, MF                | Yes (NTA)  | Yes  | Yes                 | Yes | -        | Yes              | Yes           | #    |
| Sedryakyan, 2017 [36]   | UC                    | Yes (NTA)  | -    | Yes                 | Yes | Yes      | Yes              | -             | None |
| Shi, 2020 [37]          | UC                    | Yes (NTA)  | Yes  | Yes                 | Yes | -        | Yes              | Yes           | None |
| Song, 2020 [15]         | UC                    | Yes (NTA)* | Yes* | Yes                 | Yes | -        | Yes              | -             | #    |
| Van Koppen, 2012 [12]   | DG -UC                | -          | -    | -                   | Yes | -        | Yes              | -             | #    |
| Wang, 2020 [38]         | Column method         | -          | -    | MSC-EV markers only | Yes | -        | Yes              | Yes           | None |
| Wang, 2015 [39]         | UC                    | -          | -    | MSC-EV markers only | Yes | Yes      | Yes              | Yes           | None |
| Wang, 2016 [40]         | Precipitation         | ?          | ?    | ?                   | Yes | -        | Yes              | -             | None |
| Wang, 2019 [41]         | UC, MF                | Yes (NTA)  | -    | Yes                 | Yes | Yes      | Yes              | -             | None |
| Yang, 2019 [42]         | UC                    | Yes (TEM)  | Yes  | -                   | Yes | Yes      | Yes              | -             | None |
| Zhang, 2019 [43]        | Serial centrifugation | Yes (TEM)  | -    | Yes                 | Yes | -        | Yes*             | -             | None |
| Zhang, 2019 [44]        | UC                    | Yes (TEM)  | -    | MSC-EV markers only | Yes | -        | Yes              | Yes           | None |
| Zhao, 2020 [45]         | UC                    | Yes (NTA)  | Yes  | Yes                 | Yes | Yes      | Yes              | Yes           | #    |
| Zhong, 2019 [46]        | UC                    | Yes (NTA)  | Yes  | MSC-EV markers only | Yes | -        | Yes              | Yes           | None |
| Zou, 2018 [47]          | UC                    | Yes (NTA)  | Yes  | Yes                 | Yes | -        | Yes              | Yes           | None |

Abbreviations: NTA – Nanoparticle tracking analysis, UC – Ultracentrifugation, TEM – Transmission Electron Microscopy, TRPS- Tunable Resistive Pulse Sensing, MF – Microfiltration, asterisk indicates that the data had been reported in the previous references by the same authors, minus indicates that information not available, n.a. indicates ethic statement was likely not required (in vitro study), # indicates that conflict of interest (COI) is reported but does not affect, in our interpretation, the study results.

## References:

- 1) de Couto, G., Gallet, R., Cambier, L., Jaghatspanyan, E., Makkar, N., Dawkins, J. F., Berman, B. P., & Marbán, E. (2017). Exosomal MicroRNA Transfer Into Macrophages Mediates Cellular Postconditioning. *Circulation*, 136(2), 200–214.
- 2) Ibrahim, A. G., Cheng, K., & Marbán, E. (2014). Exosomes as critical agents of cardiac regeneration triggered by cell therapy. *Stem cell reports*, 2(5), 606–619.
- 3) Collino, F., Bruno, S., Incarnato, D., Dettori, D., Neri, F., Provero, P., Pomatto, M., Oliviero, S., Tetta, C., Quesenberry, P. J., & Camussi, G. (2015). AKI Recovery Induced by Mesenchymal Stromal Cell-Derived Extracellular Vesicles Carrying MicroRNAs. *Journal of the American Society of Nephrology : JASN*, 26(10), 2349–2360. Table 2.
- 4) Eirin, A., Zhu, X. Y., Puranik, A. S., Tang, H., McGurren, K. A., van Wijnen, A. J., et al. (2017). Mesenchymal stem cell-derived extracellular vesicles attenuate kidney inflammation. *Kidney international*, 92(1), 114–124.

**Supplementary table 2.** Details of the design of the studies that focused on genetically modified EVs/miRNA effector molecules. Characteristics of the EV intervention, disease/animal model, time-points evaluated, and main study findings are outlined.

| CKD model | Study       | EV/<br>miRNA<br>source     | Dose | Adm-<br>route | Dose | EV size         | EV markers      | Species/Model                      | Sex  | EA | End | Main findings                                                                 |
|-----------|-------------|----------------------------|------|---------------|------|-----------------|-----------------|------------------------------------|------|----|-----|-------------------------------------------------------------------------------|
| UUO       | Wang, 2019  | miR-29-Satellite cells (m) | M    | IM            | n.a. | 87-93 nm (NTA)  | TSG101          | C57BL/6J mouse (UUO)               | M    | 1w | 2w  | miR-29-EVs attenuated renal fibrosis and improve kidney function in UUO mice. |
| UUO       | Zhang, 2019 | EKC (h) miR-26a-EVs        | S    | IM            | n.a. | 30-500 nm (NTA) | TSG101          | C57BL/6J mouse (UUO)               | M    | 1d | 2w  | miR-26a-EVs improved kidney fibrosis in UUO mice.                             |
| UUO       | Wang, 2016  | let7c- MSCs (h)            | n.a. | n.a.          | -    | n.a.            | ?               | In vitro (mouse TECs, TGF-β)       | n.a. | -  | -   | let-7c-EVs inhibited fibrosis gene expression.                                |
| DM        | Jin, 2020   | MSC(m)-EVs-miR-215         | n.a. | n.a.          | -    | 87-93 nm (NTA)  | CD9, CD63, CD81 | In vitro (mouse podocyte, glucose) | n.a. | -  | -   | EVs and EV-miR-215 inhibited fibrosis gene expression.                        |

Abbreviations: Cell of EV origin: EKC; embryonic kidney cell, MSC; mesenchymal stem cell. NTA; nanoparticle tracking analysis, TSG101; Tumor Susceptibility 101. CKD model: DM; diabetes, UUO; unilateral ureteral obstruction. TEC; tubular epithelial cell, TGF-β1; transforming growth factor β.

**Supplementary Table 3.** Summary of the studies which evaluated the protective effect of extracellular vesicles (EVs): study reference, cell of origin of EVs, injury model, effector molecules mediating protection, and the involvement in CKD mechanism are specified. The effect of EVs is represented: red indicates a reduction, blue indicates an elevation.

| Study            | CKD    | Cell      | Mediator                         | Fibrosis |    |                  | Cell damage |         |     |            | Inflammation |          |           | Stress |                  |
|------------------|--------|-----------|----------------------------------|----------|----|------------------|-------------|---------|-----|------------|--------------|----------|-----------|--------|------------------|
|                  |        |           |                                  | GS       | IF | Fibrosis Markers | Cell Death  | Caspase | ACR | KIM-1 NGAL | WBC          | M1 to M2 | TNF, IL-6 | IL-10  | Oxidative stress |
| Chen, 2019       | UO     | MSC       | GDNF                             |          |    |                  |             |         |     |            |              |          |           |        |                  |
| Choi, 2015       | UO     | MSC       |                                  |          |    |                  |             |         |     |            |              |          |           |        |                  |
| He, 2015         | UO     | MSC       | miRNA array                      |          |    |                  |             |         |     |            |              |          |           |        |                  |
| Ji, 2020         | UO     | MSC       | CK1δ, β-TRCP                     |          |    |                  |             |         |     |            |              |          |           |        |                  |
| Shi, 2020        | UO     | MSC       | MFG-E8                           |          |    |                  |             |         |     |            |              |          |           |        |                  |
| Wang, 2020       | UO     | MSC       | miR-294, miR-133                 |          |    |                  |             |         |     |            |              |          |           |        |                  |
| Wang, 2015       | UO     | MSC       | miRNA array                      |          |    |                  |             |         |     |            |              |          |           |        |                  |
| Wang, 2016       | UO     | MSC       | let-7c                           |          |    |                  |             |         |     |            |              |          |           |        |                  |
| Wang, 2019       | UO     | SC        | miR-29                           |          |    |                  |             |         |     |            |              |          |           |        |                  |
| Yang, 2019       | UO     | EPC       |                                  |          |    |                  |             |         |     |            |              |          |           |        |                  |
| Zhang, 2019      | UO     | EKC       | miR-26a                          |          |    |                  |             |         |     |            |              |          |           |        |                  |
| Cantaluppi, 2015 | Toxic  | EPC       | CD55, CD59, CFH miR-126, miR-296 |          |    |                  |             |         |     |            |              |          |           |        |                  |
| Kholia, 2018     | Toxic  | HLSC      |                                  |          |    |                  |             |         |     |            |              |          |           |        |                  |
| Matsakura, 2019  | Toxic  | MSC       |                                  |          |    |                  |             |         |     |            |              |          |           |        |                  |
| Ramirez, 2020    | Toxic  | MSC       |                                  |          |    |                  |             |         |     |            |              |          |           |        |                  |
| Zhang, 2019      | Toxic  | MSC       |                                  |          |    |                  |             |         |     |            |              |          |           |        |                  |
| He, 2012         | Nx     | MSC       |                                  |          |    |                  |             |         |     |            |              |          |           |        |                  |
| Koppen, 2012     | Nx     | MSC       |                                  |          |    |                  |             |         |     |            |              |          |           |        |                  |
| Cambier, 2018    | HT     | CPC       | Y4 RNA                           |          |    |                  |             |         |     |            |              |          |           |        |                  |
| Eirin, 2017      | HT     | MSC       | IL10 mRNA                        |          |    |                  |             |         |     |            |              |          |           |        |                  |
| Eirin, 2020      | HT     | MSC       | RNA-seq                          |          |    |                  |             |         |     |            |              |          |           |        |                  |
| Lindoso, 2020    | HT     | MSC       |                                  |          |    |                  |             |         |     |            |              |          |           |        |                  |
| Song, 2020       | HT     | MSC       | RNA-seq                          |          |    |                  |             |         |     |            |              |          |           |        |                  |
| Zhao, 2000       | HT     | MSC       | miR-532-5p                       |          |    |                  |             |         |     |            |              |          |           |        |                  |
| Zou, 2018        | HT     | STC       | mito-DNAs                        |          |    |                  |             |         |     |            |              |          |           |        |                  |
| Sedryakyan, 2017 | Alport | AFSC      | VEGFR1, miRNAs                   |          |    |                  |             |         |     |            |              |          |           |        |                  |
| Duan, 2000       | DM     | MSC       | miR-26a-5p                       |          |    |                  |             |         |     |            |              |          |           |        |                  |
| Duan, 2019       | DM     | uSC       | miR-16-5p                        |          |    |                  |             |         |     |            |              |          |           |        |                  |
| Ebrahim, 2018    | DM     | MSC       |                                  |          |    |                  |             |         |     |            |              |          |           |        |                  |
| Grange, 2019     | DM     | MSC, HLSC | miRNA array                      |          |    |                  |             |         |     |            |              |          |           |        |                  |
| Jiang, 2016      | DM     | uSC       |                                  |          |    |                  |             |         |     |            |              |          |           |        |                  |
| Jin, 2019        | DM     | MSC       | miR-486                          |          |    |                  |             |         |     |            |              |          |           |        |                  |
| Jin, 2020        | DM     | MSC       | miR-215-5p                       |          |    |                  |             |         |     |            |              |          |           |        |                  |
| Nagaishi, 2016   | DM     | MSC       |                                  |          |    |                  |             |         |     |            |              |          |           |        |                  |
| Zhong, 2019      | DM     | MSC       | miR-451a                         |          |    |                  |             |         |     |            |              |          |           |        |                  |

Abbreviations: GS; percent glomerular sclerosis, IF; percent tubulointerstitial fibrosis ACR albumin to creatinine ratio; M1 to M2 macrophage ratio, IL-10; interleukin-10, tubular markers: KIM-1; kidney injury molecule-1, NGAL; neutrophil gelatinase-associated lipocalin, WBC; White blood cell infiltrates, NGAL; Neutrophil gelatinase-associated lipocalin, WBC; White blood cell infiltrates, Cell of EV origin: AFSC; amniotic fluid stem cell, CPC; cardiac progenitor cell, EKC; embryonic kidney cell, EPC; endothelial progenitor cell, HLSC; liver stem cell, MSC; mesenchymal stem cell, SC; satellite cell, STC; STC-like cell, uSC; urine stem cell.

**Supplementary figure 1;** Standardized mean difference (SMD) in glomerular filtration rate (GFR). Data represent SMD calculated for treated versus non-treated comparisons of all records, with the 95% confidence interval (95% CI). RE, random effect

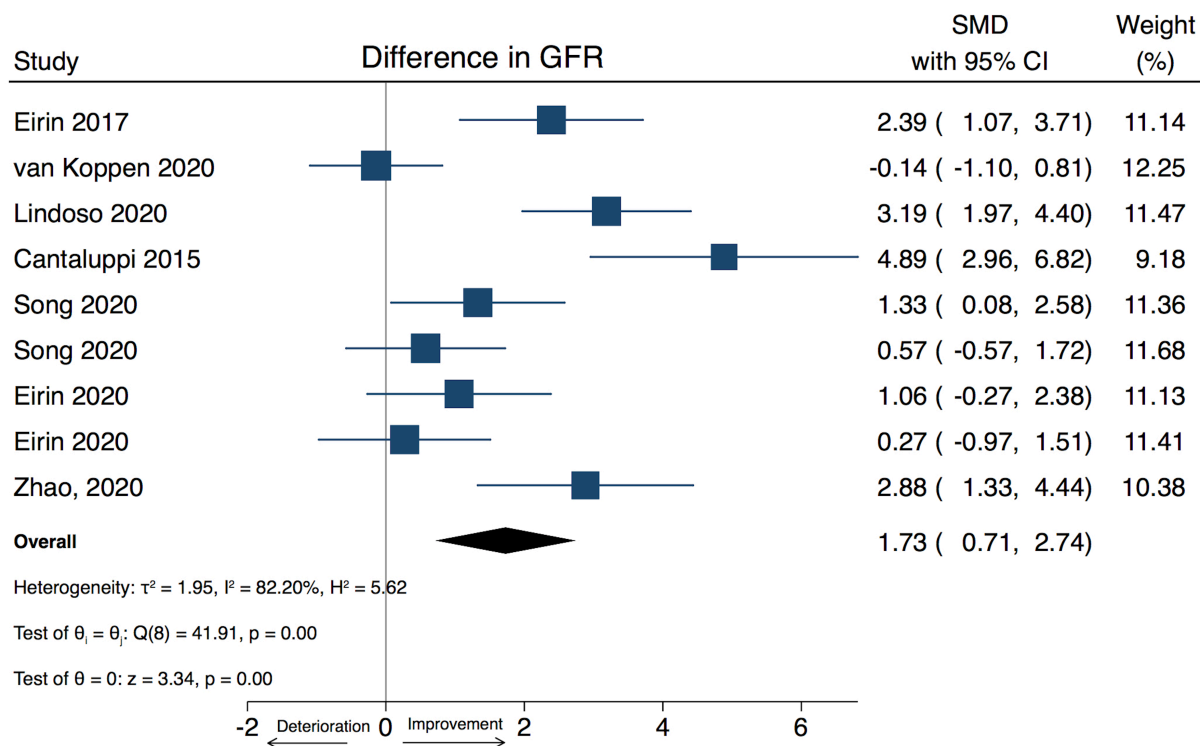

**Supplementary figure 2;** Subgroup analyses: standardized mean difference (SMD) in (A) serum creatinine and (B) urea. Data represent SMD based on EV intervention-related and model related factors with the 95% confidence interval (95% CI). RE, random effect.

**A. Differences in serum creatinine due to EV treatment-related and model-related factors**

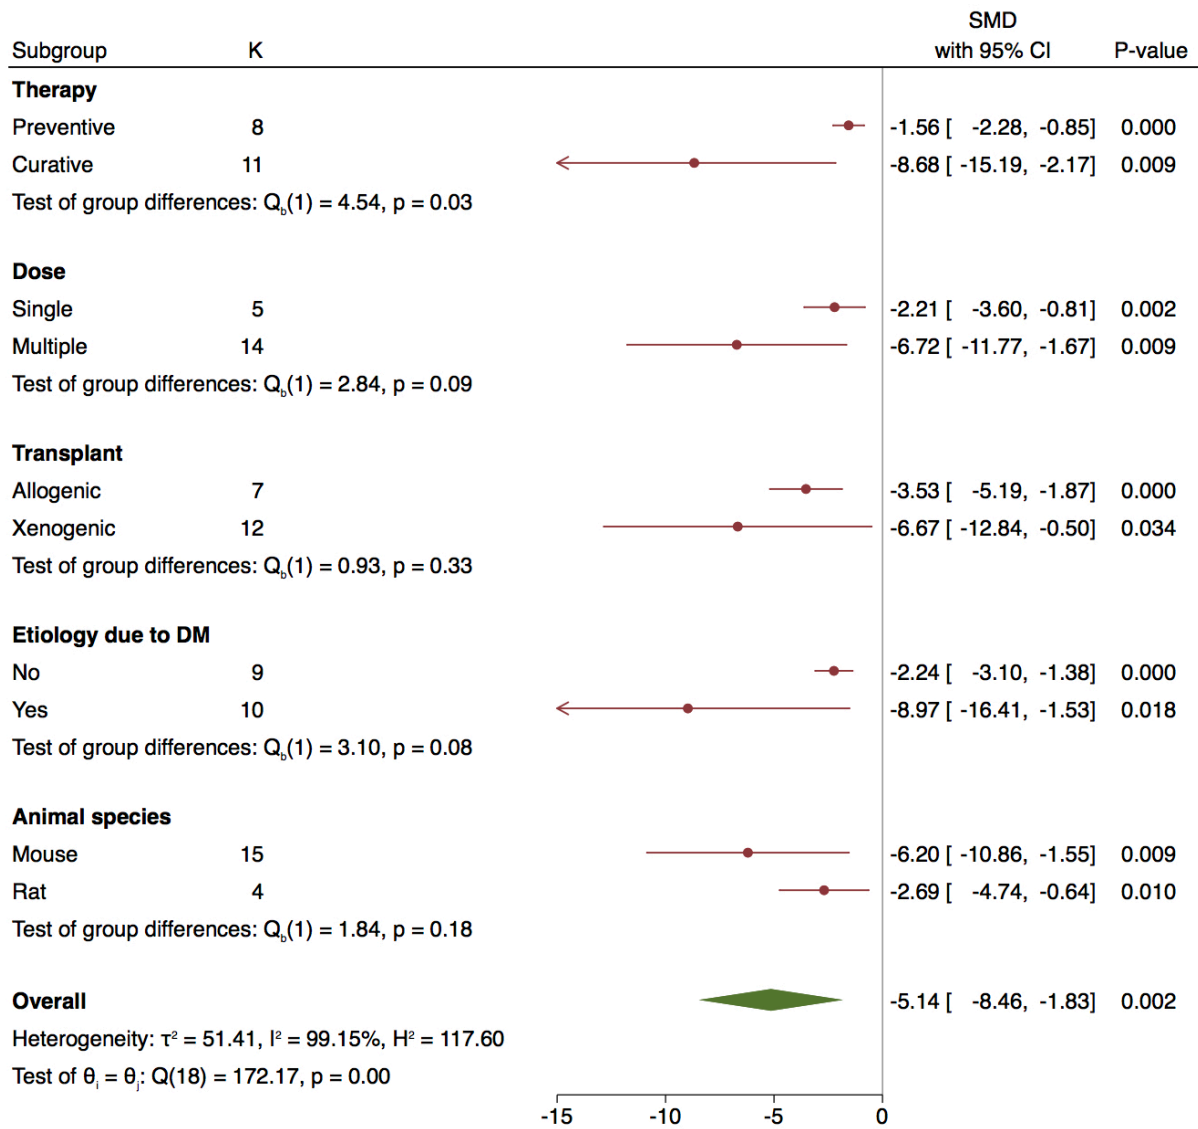

Random-effects REML model

## B. Differences in serum urea due to EV-treatment and model-related factors

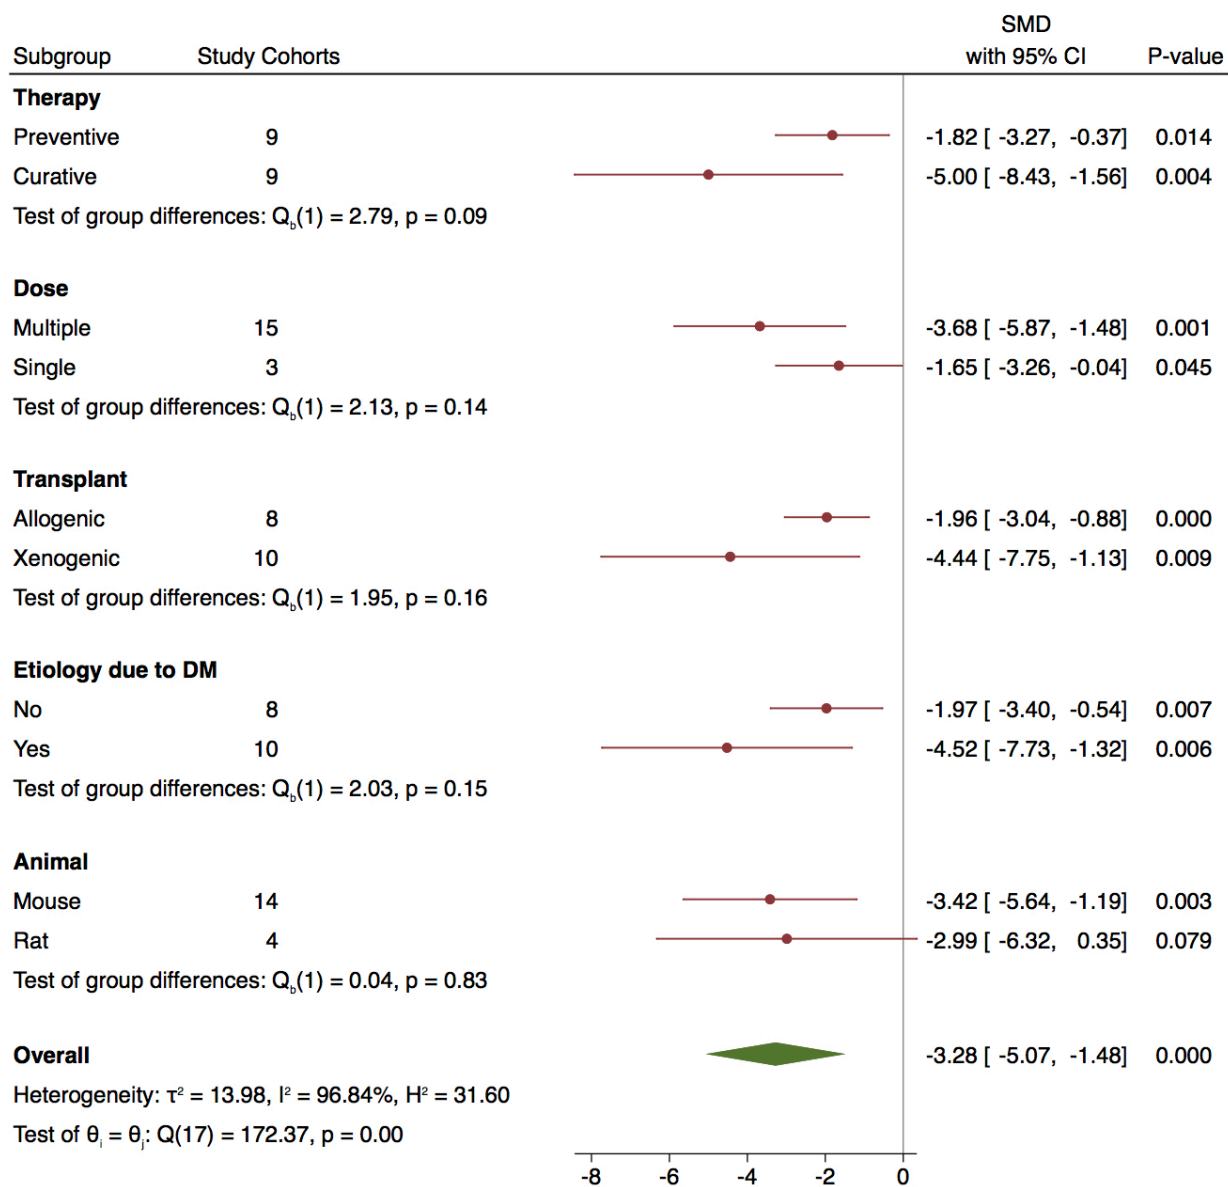

Random-effects REML model



**Supplementary figure 3; Sensitivity analysis: standardized mean difference (SMD) in (A) serum creatinine and (B) urea for all studies in animal CKD. Data represent SMD calculated for treated versus non-treated comparisons of all records, with the 95% confidence interval (95% CI). RE, random effect.**

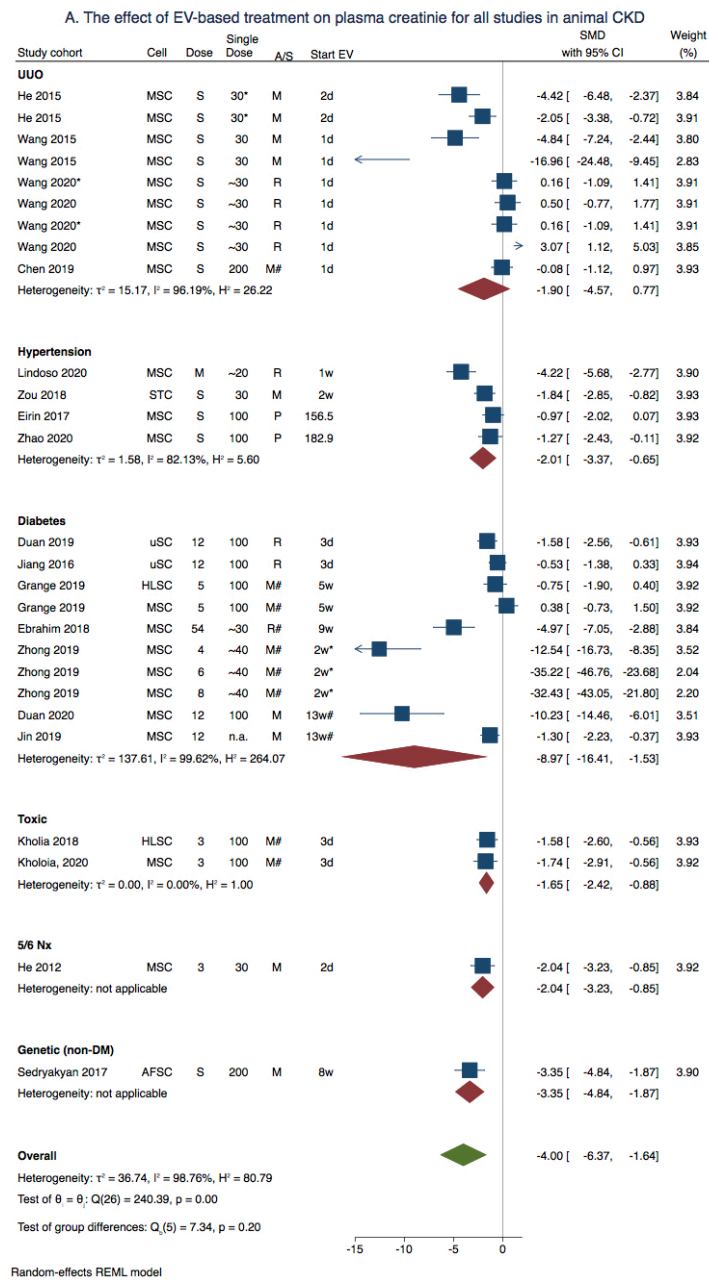

B. The effect of EV-based treatment on plasma urea for all studies in CKD

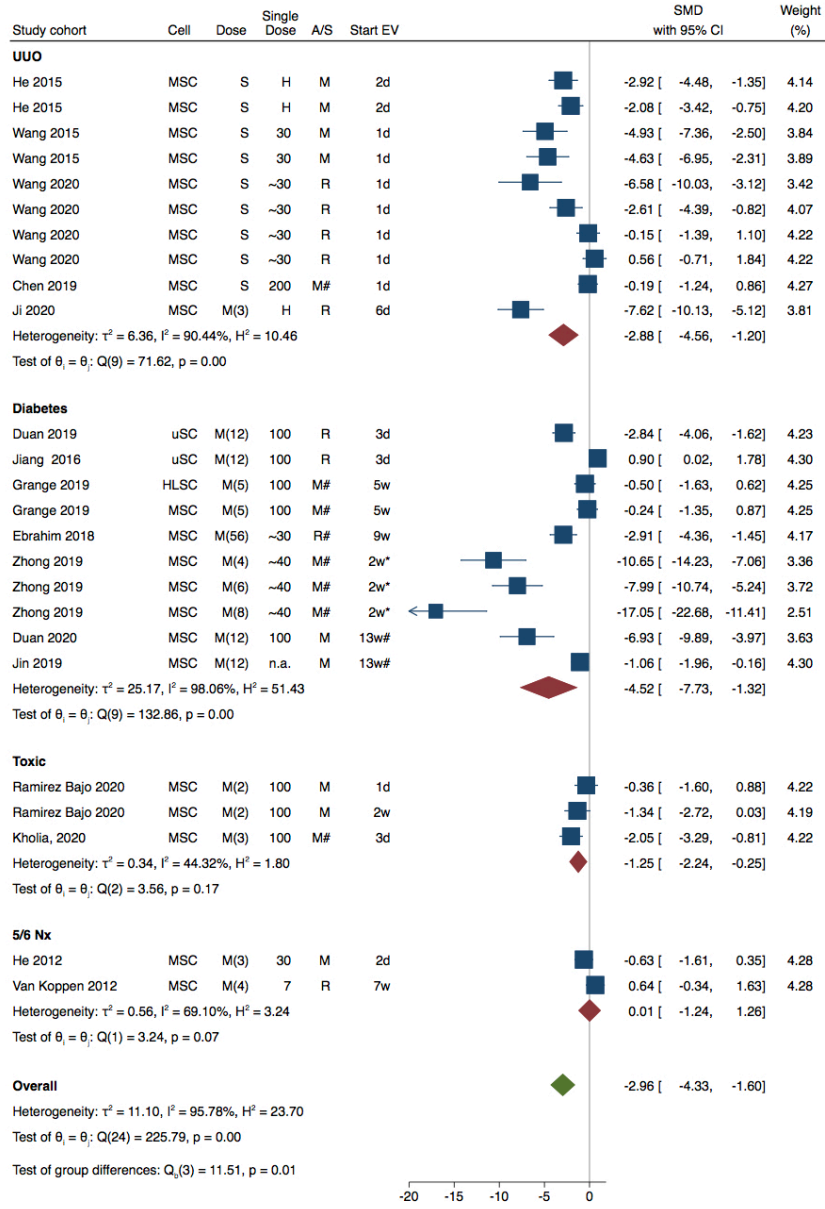

Random-effects REML model  
Sorted by: order

**Supplementary figure 4;** Subgroup analyses conducted for all study cohorts: standardized mean difference (SMD) in (A) serum creatinine and (B) urea. Data represent SMD calculated based on different factors, with the 95% confidence interval (95% CI). RE, random effect.

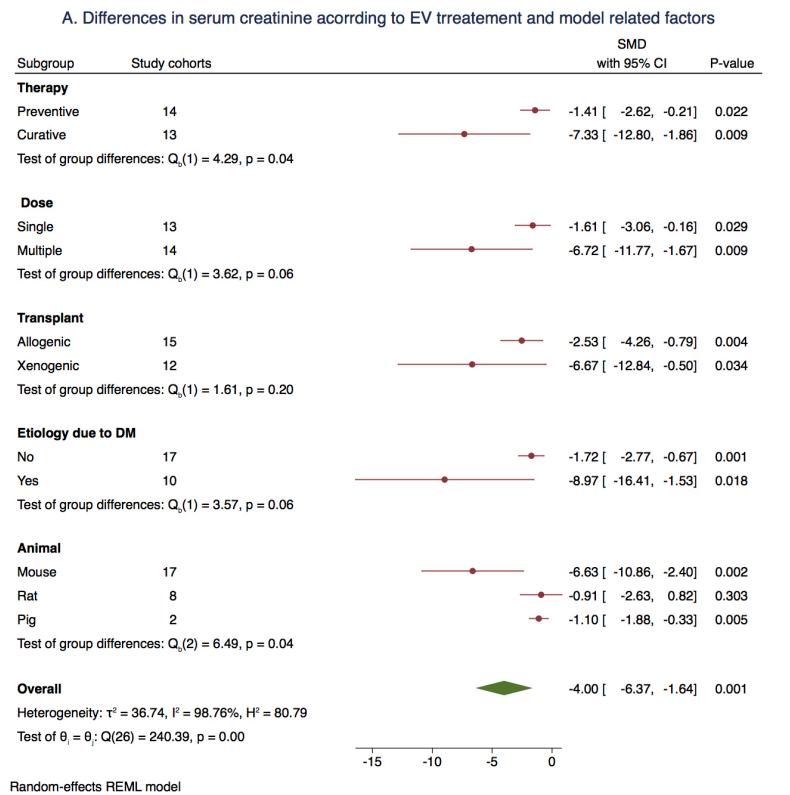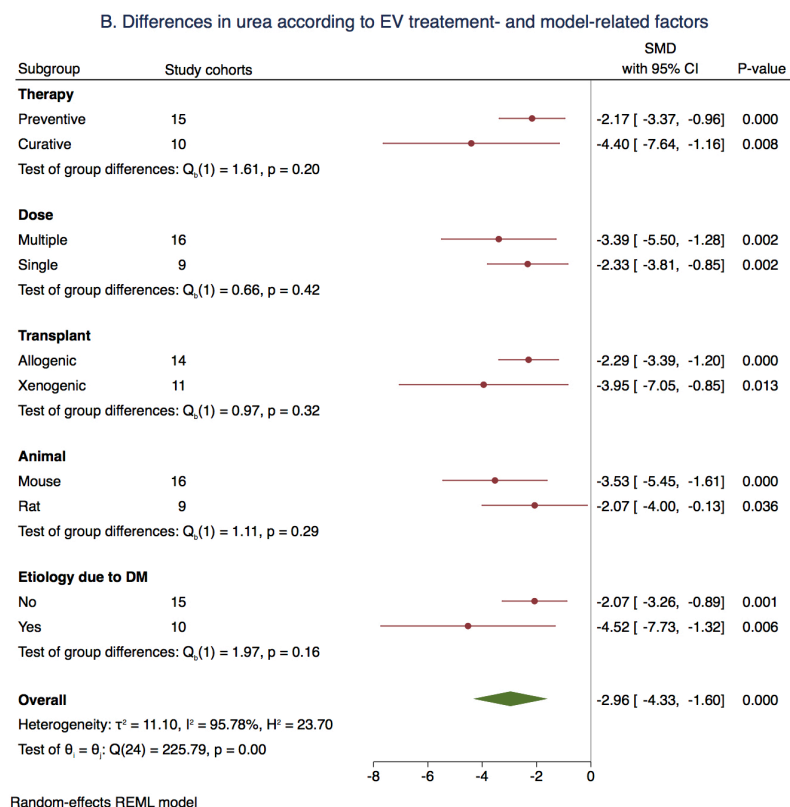

Supplement: 12015_2021_10189_MOESM1_ESM.pdf [file 12015_2021_10189_MOESM1_ESM.pdf]
